# Supplementary material
Source: MDPI journal article supplement (https://www.mdpi.com/2673-5636/4/1/12)
Supplement: s1 [file s1]

# Supplementary Materials:

**Table S1.** Preliminary data to assess for cross-reactivity of haptoglobin, serum amyloid-A (Vet-SAA and SAA-LZ) and C-reactive protein (O-CRP and R-CRP) in the hamadryas baboon.

| Protein     | Units | Status          | <i>n</i> | Mean  | Median | Min   | Max    |
|-------------|-------|-----------------|----------|-------|--------|-------|--------|
| Haptoglobin | mg/mL | Healthy         | 4        | 2.80  | 2.51   | 1.25  | 4.91   |
|             |       | Acutely ill     | 5        | 2.66  | 2.37   | 1.69  | 4.69   |
|             |       | Chronically ill | 5        | 1.28  | 1.22   | 0.80  | 2.85   |
| Vet-SAA     | mg/L  | Healthy         | 4        | 10.4  | 10.9   | 3.0   | 16.8   |
|             |       | Acutely ill     | 5        | 479.6 | 419.6  | 2.6   | 1396.6 |
|             |       | Chronically ill | 5        | 8.3   | 4.9    | 2.3   | 25.6   |
| SAA-LZ      | mg/L  | Healthy         | 4        | 0.28  | 0.2    | <0.1* | 0.7    |
|             |       | Acutely ill     | 5        | <0.1* | <0.1*  | <0.1* | 0.3    |
|             |       | Chronically ill | 5        | 1.36  | <0.1*  | <0.1* | 6.5    |
| O-CRP       | mg/L  | Healthy         | 4        | 11.8  | 11.2   | 8.3   | 16.5   |
|             |       | Acutely ill     | 5        | 33.0  | 31.7   | 7.8   | 44.9   |
|             |       | Chronically ill | 5        | 12.0  | 10.7   | 8.7   | 15.2   |
| R-CRP       | mg/L  | Healthy         | 37       | 10.0  | 5.1    | 0.1   | 97.1   |
|             |       | Acutely ill     | 12       | 374.4 | 140.6  | 0.1   | 2116.0 |

\* Below the limit of detection.

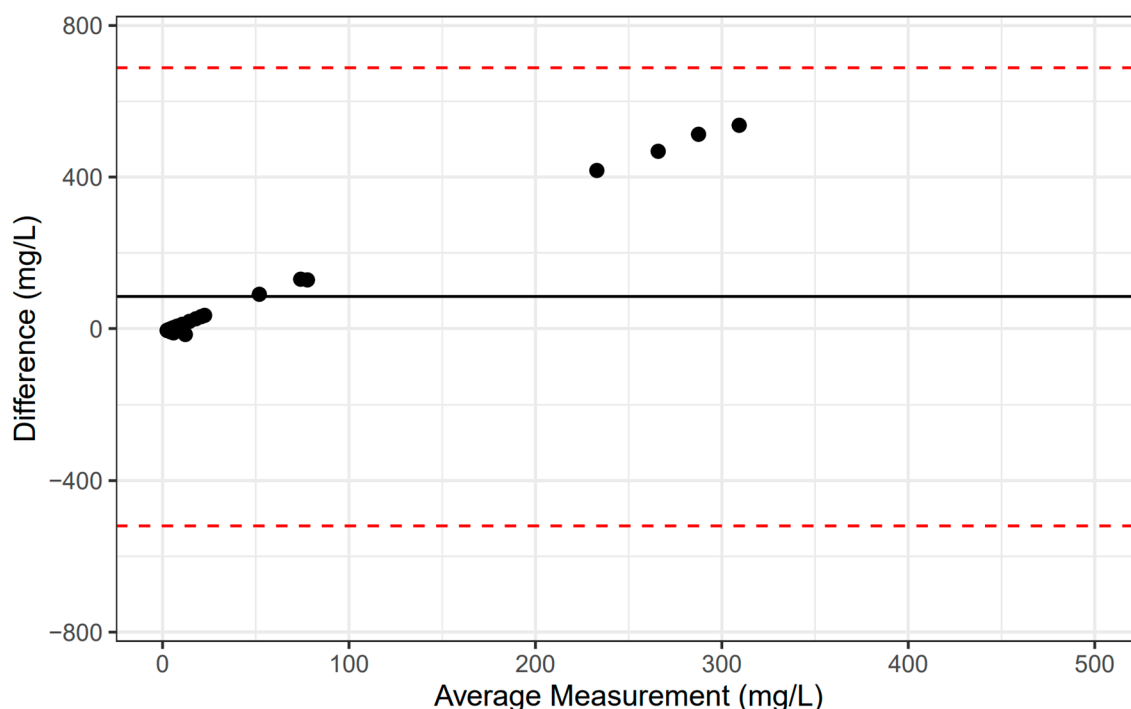

**Figure S1.** Bland-Altman plot demonstrating poor agreement between C-reactive protein measurements in hamadryas baboons using two different reagents, O-CRP and R-CRP. The solid black line denotes the average difference (84 mg/L), and the red dashed lines denote a 95% confidence interval of the average difference (-519-689 mg/L).

**Table S2.** Descriptive statistics of serum amyloid A (SAA), C-reactive protein (CRP), and protein electrophoresis fractions in healthy female and male hamadryas baboons. An asterisk indicates statistical significance between females and males,  $p \leq 0.05$ .

| Protein    | Units | Sex | <i>n</i> | Mean | Median | Min  | Max  |
|------------|-------|-----|----------|------|--------|------|------|
| SAA        | mg/L  | F   | 22       | 11.3 | 5.7    | 1.9  | 62.6 |
|            |       | M   | 19       | 8.9  | 3.3    | 1.3  | 67.1 |
| CRP        | mg/L  | F   | 19       | 12.4 | 5.0    | 0.1  | 97.1 |
|            |       | M   | 18       | 7.5  | 5.6    | 0.1  | 39.9 |
| A/G Ratio  | g/dL  | F   | 19       | 1.2  | 1.1    | 0.8  | 1.9  |
|            |       | M   | 18       | 1.4  | 1.4    | 0.9  | 1.7  |
| Prealbumin | g/dL  | F   | 19       | 0.1  | 0.1    | 0.1  | 0.2  |
|            |       | M   | 18       | 0.1  | 0.1    | 0.1  | 0.2  |
|            | %     | F   | 19       | 1.5  | 1.5    | 0.7  | 2.2  |
|            |       | M   | 18       | 1.5  | 1.5    | 0.9  | 2.4  |
| Albumin    | g/dL  | F   | 19       | 3.4  | 3.4    | 2.6  | 4.1  |
|            |       | M   | 18       | 3.5  | 3.5    | 3.0  | 4.0  |
|            | %     | F   | 19       | 51.4 | 51.2   | 41.3 | 64.4 |
|            |       | M   | 18       | 56.3 | 57.3   | 44.2 | 61.8 |
| Alpha-1    | g/dL  | F   | 19       | 0.3  | 0.3    | 0.2  | 0.3  |
|            |       | M   | 18       | 0.3  | 0.3    | 0.2  | 0.3  |
|            | %     | F   | 19       | 4.0  | 4.0    | 3.4  | 5.2  |
|            |       | M   | 18       | 4.1  | 4.1    | 3.6  | 5.2  |
| Alpha-2    | g/dL  | F*  | 19       | 0.8  | 0.8    | 0.5  | 1.1  |
|            |       | M   | 18       | 0.6  | 0.6    | 0.4  | 1.1  |
|            | %     | F   | 19       | 12.1 | 12.3   | 8.7  | 15.3 |
|            |       | M   | 18       | 10.1 | 9.4    | 7.4  | 15.7 |
| Beta-1     | g/dL  | F   | 19       | 0.7  | 0.8    | 0.5  | 0.9  |
|            |       | M   | 18       | 0.6  | 0.6    | 0.5  | 0.9  |
|            | %     | F   | 19       | 10.9 | 11.1   | 8.4  | 12.5 |
|            |       | M   | 18       | 10.0 | 10.0   | 7.9  | 12.1 |
| Beta-2     | g/dL  | F   | 19       | 0.5  | 0.5    | 0.3  | 0.7  |
|            |       | M   | 18       | 0.4  | 0.4    | 0.3  | 0.6  |
|            | %     | F   | 19       | 7.3  | 7.3    | 4.1  | 9.7  |
|            |       | M   | 18       | 6.7  | 6.7    | 4.3  | 9.0  |
| Total beta | g/dL  | F   | 19       | 1.2  | 1.3    | 0.8  | 1.5  |
|            |       | M   | 18       | 1.0  | 1.0    | 0.7  | 1.5  |
|            | %     | F   | 19       | 18.2 | 18.8   | 12.5 | 21.8 |
|            |       | M   | 18       | 16.7 | 16.5   | 13.7 | 20.2 |
| Gamma      | g/dL  | F   | 19       | 0.8  | 0.9    | 0.4  | 1.1  |
|            |       | M   | 18       | 0.7  | 0.7    | 0.4  | 1.0  |
|            | %     | F   | 19       | 12.8 | 13.1   | 7.1  | 16.8 |
|            |       | M   | 18       | 11.3 | 11.7   | 7.8  | 14.2 |

**Table S3.** Descriptive statistics of serum amyloid A (SAA), C-reactive protein (CRP), and protein electrophoresis fractions in healthy hamadryas baboons separated by age class; infant (< 2 years old), juvenile (2-4 years old), subadult (5-7 years old), adult (8-25 years old), and geriatric (>25 years old). Statistically significant differences between age classes are denoted by superscript letters A-D. Age classes that are significantly different do not share a superscript letter. Age classes with no superscript letter demonstrated no significant difference from the other age classes for that measured protein. Statistical significance was determined by a  $p$  value  $\leq 0.05$ .

| Protein    | Units | Sex                     | <i>n</i> | Mean | Median | Min  | Max  |
|------------|-------|-------------------------|----------|------|--------|------|------|
| SAA        | mg/L  | Infant                  | 7        | 4.6  | 4.9    | 1.3  | 6.6  |
|            |       | Juvenile                | 11       | 11.7 | 3.1    | 1.3  | 67.1 |
|            |       | Subadult                | 10       | 3.6  | 2.9    | 1.4  | 7.8  |
|            |       | Adult                   | 10       | 17.6 | 15.4   | 2.1  | 62.6 |
|            |       | Geriatric               | 3        | 14.9 | 17.5   | 6.0  | 21.3 |
| CRP        | mg/L  | Infant <sup>A</sup>     | 6        | 0.3  | 0.1    | 0.1  | 1.0  |
|            |       | Juvenile <sup>B</sup>   | 11       | 9.6  | 6.0    | 2.9  | 39.9 |
|            |       | Subadult <sup>AB</sup>  | 10       | 6.3  | 4.7    | 0.1  | 23.7 |
|            |       | Adult <sup>B</sup>      | 7        | 22.2 | 6.5    | 3.4  | 97.1 |
|            |       | Geriatric <sup>AB</sup> | 3        | 15.4 | 9.7    | 0.1  | 36.4 |
| A/G Ratio  | g/dL  | Infant <sup>A</sup>     | 6        | 1.6  | 1.6    | 1.4  | 1.9  |
|            |       | Juvenile <sup>A</sup>   | 11       | 1.4  | 1.5    | 1.3  | 1.6  |
|            |       | Subadult <sup>B</sup>   | 10       | 1.2  | 1.2    | 0.9  | 1.5  |
|            |       | Adult <sup>C</sup>      | 7        | 1.0  | 1.0    | 0.8  | 1.1  |
|            |       | Geriatric <sup>C</sup>  | 3        | 0.9  | 0.9    | 0.8  | 0.9  |
| Prealbumin | g/dL  | Infant <sup>AB</sup>    | 6        | 0.1  | 0.1    | 0.1  | 0.1  |
|            |       | Juvenile <sup>A</sup>   | 11       | 0.1  | 0.1    | 0.1  | 0.1  |
|            |       | Subadult <sup>AB</sup>  | 10       | 0.1  | 0.1    | 0.1  | 0.2  |
|            |       | Adult <sup>B</sup>      | 7        | 0.1  | 0.1    | 0.1  | 0.2  |
|            |       | Geriatric <sup>AB</sup> | 3        | 0.1  | 0.1    | 0.1  | 0.1  |
|            | %     | Infant                  | 6        | 1.5  | 1.6    | 0.9  | 2.1  |
|            |       | Juvenile                | 11       | 1.4  | 1.4    | 1.1  | 2.0  |
|            |       | Subadult                | 10       | 1.4  | 1.4    | 0.7  | 1.9  |
|            |       | Adult                   | 7        | 1.9  | 1.8    | 1.5  | 2.4  |
|            |       | Geriatric               | 3        | 1.5  | 1.4    | 1.2  | 2.0  |
| Albumin    | g/dL  | Infant <sup>AB</sup>    | 6        | 3.6  | 3.6    | 3.0  | 4.1  |
|            |       | Juvenile <sup>AB</sup>  | 11       | 3.4  | 3.5    | 3.0  | 3.8  |
|            |       | Subadult <sup>A</sup>   | 10       | 3.6  | 3.6    | 3.4  | 4.1  |
|            |       | Adult <sup>B</sup>      | 7        | 3.1  | 3.2    | 2.6  | 3.8  |
|            |       | Geriatric <sup>B</sup>  | 3        | 3.1  | 3.0    | 2.8  | 3.3  |
|            | %     | Infant <sup>A</sup>     | 6        | 60.4 | 60.0   | 56.8 | 64.4 |
|            |       | Juvenile <sup>AB</sup>  | 11       | 57.4 | 57.7   | 54.4 | 60.8 |
|            |       | Subadult <sup>B</sup>   | 10       | 53.4 | 53.5   | 46.0 | 58.6 |
|            |       | Adult <sup>C</sup>      | 7        | 46.7 | 46.9   | 41.3 | 51.2 |
|            |       | Geriatric <sup>C</sup>  | 3        | 44.8 | 44.2   | 42.7 | 47.4 |

|            |      |                         |    |      |      |      |      |
|------------|------|-------------------------|----|------|------|------|------|
| Alpha-1    | g/dL | Infant                  | 6  | 0.3  | 0.3  | 0.2  | 0.3  |
|            |      | Juvenile                | 11 | 0.2  | 0.3  | 0.2  | 0.3  |
|            |      | Subadult                | 10 | 0.3  | 0.3  | 0.2  | 0.3  |
|            |      | Adult                   | 7  | 0.3  | 0.3  | 0.2  | 0.3  |
|            |      | Geriatric               | 3  | 0.3  | 0.3  | 0.3  | 0.3  |
|            | %    | Infant                  | 6  | 4.5  | 4.4  | 3.8  | 5.2  |
|            |      | Juvenile                | 11 | 4.1  | 4.2  | 3.8  | 4.5  |
|            |      | Subadult                | 10 | 3.9  | 4.0  | 3.6  | 4.1  |
|            |      | Adult                   | 7  | 4.0  | 4.1  | 3.4  | 4.6  |
|            |      | Geriatric               | 3  | 3.8  | 3.7  | 3.5  | 4.2  |
| Alpha-2    | g/dL | Infant <sup>AB</sup>    | 6  | 0.6  | 0.6  | 0.5  | 0.7  |
|            |      | Juvenile <sup>A</sup>   | 11 | 0.5  | 0.6  | 0.4  | 0.7  |
|            |      | Subadult <sup>B</sup>   | 10 | 0.8  | 0.7  | 0.6  | 1.1  |
|            |      | Adult <sup>B</sup>      | 7  | 0.9  | 0.9  | 0.7  | 1.0  |
|            |      | Geriatric <sup>AB</sup> | 3  | 1.0  | 1.0  | 0.9  | 1.1  |
|            | %    | Infant <sup>ABC</sup>   | 6  | 10.4 | 10.9 | 8.2  | 12.1 |
|            |      | Juvenile <sup>AB</sup>  | 11 | 9.2  | 8.9  | 7.4  | 12.7 |
|            |      | Subadult <sup>C</sup>   | 10 | 11.4 | 10.9 | 9.4  | 15.3 |
|            |      | Adult <sup>CD</sup>     | 7  | 12.9 | 13.0 | 10.5 | 14.8 |
|            |      | Geriatric <sup>D</sup>  | 3  | 14.6 | 14.1 | 13.9 | 15.7 |
| Beta-1     | g/dL | Infant <sup>A</sup>     | 6  | 0.5  | 0.5  | 0.5  | 0.7  |
|            |      | Juvenile <sup>A</sup>   | 11 | 0.6  | 0.6  | 0.5  | 0.7  |
|            |      | Subadult <sup>B</sup>   | 10 | 0.7  | 0.7  | 0.6  | 0.9  |
|            |      | Adult <sup>B</sup>      | 7  | 0.8  | 0.8  | 0.7  | 0.9  |
|            |      | Geriatric <sup>B</sup>  | 3  | 0.8  | 0.8  | 0.8  | 0.8  |
|            | %    | Infant <sup>A</sup>     | 6  | 9.2  | 8.8  | 7.9  | 11.3 |
|            |      | Juvenile <sup>AB</sup>  | 11 | 9.7  | 9.8  | 8.2  | 10.9 |
|            |      | Subadult <sup>BC</sup>  | 10 | 10.7 | 10.6 | 9.4  | 12.2 |
|            |      | Adult <sup>C</sup>      | 7  | 11.8 | 12.0 | 11.1 | 12.5 |
|            |      | Geriatric <sup>C</sup>  | 3  | 11.5 | 11.5 | 11.1 | 11.8 |
| Beta-2     | g/dL | Infant <sup>A</sup>     | 6  | 0.3  | 0.3  | 0.3  | 0.4  |
|            |      | Juvenile <sup>B</sup>   | 11 | 0.4  | 0.4  | 0.3  | 0.5  |
|            |      | Subadult <sup>BC</sup>  | 10 | 0.5  | 0.5  | 0.4  | 0.6  |
|            |      | Adult <sup>C</sup>      | 7  | 0.6  | 0.6  | 0.5  | 0.7  |
|            |      | Geriatric <sup>C</sup>  | 3  | 0.6  | 0.6  | 0.6  | 0.6  |
|            | %    | Infant <sup>A</sup>     | 6  | 5.2  | 5.3  | 4.1  | 6.5  |
|            |      | Juvenile <sup>B</sup>   | 11 | 6.7  | 6.6  | 6.0  | 8.0  |
|            |      | Subadult <sup>B</sup>   | 10 | 7.0  | 6.9  | 5.4  | 9.0  |
|            |      | Adult <sup>C</sup>      | 7  | 8.5  | 8.1  | 7.2  | 9.7  |
|            |      | Geriatric <sup>C</sup>  | 3  | 8.8  | 8.5  | 8.4  | 9.5  |
| Total beta | g/dL | Infant <sup>A</sup>     | 6  | 0.9  | 0.8  | 0.7  | 1.0  |
|            |      | Juvenile <sup>A</sup>   | 11 | 1.0  | 1.0  | 0.8  | 1.1  |

|       |      |                         |    |      |      |      |      |
|-------|------|-------------------------|----|------|------|------|------|
|       |      | Subadult <sup>B</sup>   | 10 | 1.2  | 1.2  | 1.0  | 1.5  |
|       |      | Adult <sup>B</sup>      | 7  | 1.4  | 1.4  | 1.2  | 1.5  |
|       |      | Geriatric <sup>B</sup>  | 3  | 1.4  | 1.4  | 1.4  | 1.4  |
|       | %    | Infant <sup>A</sup>     | 6  | 14.4 | 14.5 | 12.5 | 15.6 |
|       |      | Juvenile <sup>AB</sup>  | 11 | 16.4 | 16.2 | 14.4 | 18.5 |
|       |      | Subadult <sup>BC</sup>  | 10 | 17.7 | 17.5 | 14.8 | 20.0 |
|       |      | Adult <sup>D</sup>      | 7  | 20.2 | 20.2 | 18.3 | 21.8 |
|       |      | Geriatric <sup>CD</sup> | 3  | 20.3 | 20.2 | 19.6 | 21.0 |
| Gamma | g/dL | Infant <sup>A</sup>     | 6  | 0.5  | 0.5  | 0.4  | 0.8  |
|       |      | Juvenile <sup>AB</sup>  | 11 | 0.7  | 0.7  | 0.5  | 0.8  |
|       |      | Subadult <sup>BC</sup>  | 10 | 0.8  | 0.8  | 0.6  | 1.1  |
|       |      | Adult <sup>C</sup>      | 7  | 1.0  | 1.0  | 0.8  | 1.1  |
|       |      | Geriatric <sup>C</sup>  | 3  | 1.0  | 1.0  | 1.0  | 1.1  |
|       | %    | Infant <sup>A</sup>     | 6  | 8.7  | 8.1  | 7.1  | 12.9 |
|       |      | Juvenile <sup>AB</sup>  | 11 | 11.5 | 11.8 | 8.4  | 13.3 |
|       |      | Subadult <sup>BC</sup>  | 10 | 12.2 | 12.5 | 8.8  | 16.8 |
|       |      | Adult <sup>C</sup>      | 7  | 14.2 | 14.5 | 11.7 | 16.4 |
|       |      | Geriatric <sup>BC</sup> | 3  | 15.1 | 14.2 | 14.2 | 16.8 |

**Disclaimer/Publisher's Note:** The statements, opinions and data contained in all publications are solely those of the individual author(s) and contributor(s) and not of MDPI and/or the editor(s). MDPI and/or the editor(s) disclaim responsibility for any injury to people or property resulting from any ideas, methods, instructions or products referred to in the content.
